# Supplementary material for: An analysis of 30 years of surface ozone concentrations in Austria: temporal evolution, changes in precursor emissions and chemical regimes, temperature dependence, and lessons for the future
Source: Royal Society of Chemistry journal article supplement (doi:10.1039/d2ea00004k), 2022-01-01
Supplement: d2ea00004k1.pdf [file d2ea00004k1.pdf]

## Supplementary information

- 5 **Table S1:** List of O<sub>3</sub> background sites of the Austrian monitoring network used in this study. Station printed in bold provide NO<sub>x</sub> observations for the whole study period along with ozone measurements. Sites marked with \* indicate the sites selected for representative analysis.

| Station name                     | category | Airbase code    | Station name                     | category     | Airbase code                   |
|----------------------------------|----------|-----------------|----------------------------------|--------------|--------------------------------|
| <b>1 Amstetten</b>               | urban    | <b>AT30101</b>  | 29 Arnfels                       | rural        | AT60190                        |
| 2 Graz, Schlossberg              | urban    | AT60018         | <b>30 Dunkelsteinerwald</b>      | <b>Rural</b> | <b>AT31701</b>                 |
| <b>3 Leoben</b>                  | urban    | <b>AT60143</b>  | <b>31 Forsthof am Schöpfl</b>    | <b>rural</b> | <b>AT30202</b>                 |
| <b>4 Linz, Neue Welt</b>         | urban    | <b>AT4S416</b>  | <b>32 Gänsersdorf</b>            | <b>rural</b> | <b>AT30401</b>                 |
| <b>5 St. Pölten</b>              | urban    | <b>AT32301</b>  | 33 Grundlsee                     | rural        | AT60157                        |
| <b>6 Vienna, Stephansplatz*</b>  | urban    | <b>AT9STEF</b>  | <b>34 Haunsberg</b>              | rural        | AT53055                        |
| <b>7 Bad Ischl</b>               | suburban | <b>AT4S125</b>  | <b>35 Heidenreichstein</b>       | <b>rural</b> | <b>AT30502</b>                 |
| <b>8 Bad Vöslau - Gainfarn</b>   | suburban | <b>AT30201</b>  | 36 Hochgössnitz                  | rural        | AT60137                        |
| <b>9 Eisenstadt</b>              | suburban | <b>AT10001</b>  | <b>37 Höfen Lärchbichl</b>       | rural        | AT72705                        |
| <b>10 Graz Nord*</b>             | suburban | <b>AT60138</b>  | <b>38 Illmitz*</b>               | <b>rural</b> | <b>AT0ILL1</b>                 |
| <b>11 Hainburg</b>               | suburban | <b>AT30301</b>  | 39 Irnfritz                      | rural        | AT30801                        |
| <b>12 Innsbruck Sadrach</b>      | suburban | <b>AT72113</b>  | <b>40 Klöch*</b>                 | <b>rural</b> | <b>AT60185 (O<sub>3</sub>)</b> |
| <b>13 Judenburg</b>              | suburban | <b>AT60018</b>  | <b>Klöch*</b>                    | <b>rural</b> | <b>AT0KLH1(NO<sub>x</sub>)</b> |
| 14 Klagenfurt Kreuzbergl         | suburban | AT2KA41         | 41 Kollmitzberg                  | rural        | AT30103                        |
| <b>15 Klosterneuburg</b>         | suburban | <b>AT30601</b>  | <b>42 Kramsach Angerberg</b>     | <b>rural</b> | <b>AT72538</b>                 |
| 16 Lustenau Wiesenrain           | suburban | AT80706         | <b>43 Masenberg*</b>             | <b>rural</b> | <b>AT60156</b>                 |
| <b>17 Mödling</b>                | suburban | <b>AT31401</b>  | 44 Mistelbach                    | rural        | AT331301                       |
| <b>18 Spittal a.d.Drau</b>       | suburban | <b>AT2SP18</b>  | <b>45 Obervellach</b>            | <b>rural</b> | <b>AT2SP10</b>                 |
| <b>19 St. Johann im Pongau</b>   | suburban | <b>AT54057</b>  | <b>46 Pillersdorf</b>            | <b>rural</b> | <b>AT0PIL1</b>                 |
| <b>20 Steyr</b>                  | suburban | <b>AT4S409</b>  | <b>47 St. Georgen /Lavanttal</b> | <b>rural</b> | <b>AT2WO35</b>                 |
| <b>21 Traun</b>                  | suburban | <b>AT4S404</b>  | 48 St. Koloman Kleinhorn         | rural        | AT52055                        |
| <b>22 Vienna, Hermannskogel*</b> | suburban | <b>AT9JAEG</b>  | <b>49 Stixneusiedl</b>           | <b>rural</b> | <b>AT30302</b>                 |
| <b>23 Vienna, Hohe Warte</b>     | suburban | <b>AT900ZA</b>  | <b>50 Streithofen</b>            | <b>rural</b> | <b>AT31904</b>                 |
| 24 Vienna, Laaer Berg            | suburban | AT90LAA         | <b>51 Sulzberg - Gmeind</b>      | <b>rural</b> | <b>AT80503</b>                 |
| <b>25 Vienna, Lobau</b>          | suburban | <b>AT90LOB</b>  | <b>52 Vorhegg</b>                | <b>rural</b> | <b>AT0VOR1</b>                 |
| <b>26 Wiener Neustadt</b>        | suburban | <b>AT332401</b> | 53 Wiesmath                      | rural        | AT32101                        |
| <b>27 Wolfsberg</b>              | suburban | <b>AT2WO15</b>  | <b>54 Wolkersdorf</b>            | <b>rural</b> | <b>AT30403</b>                 |
| 28 Annaberg                      | rural    | AT31102         |                                  |              |                                |

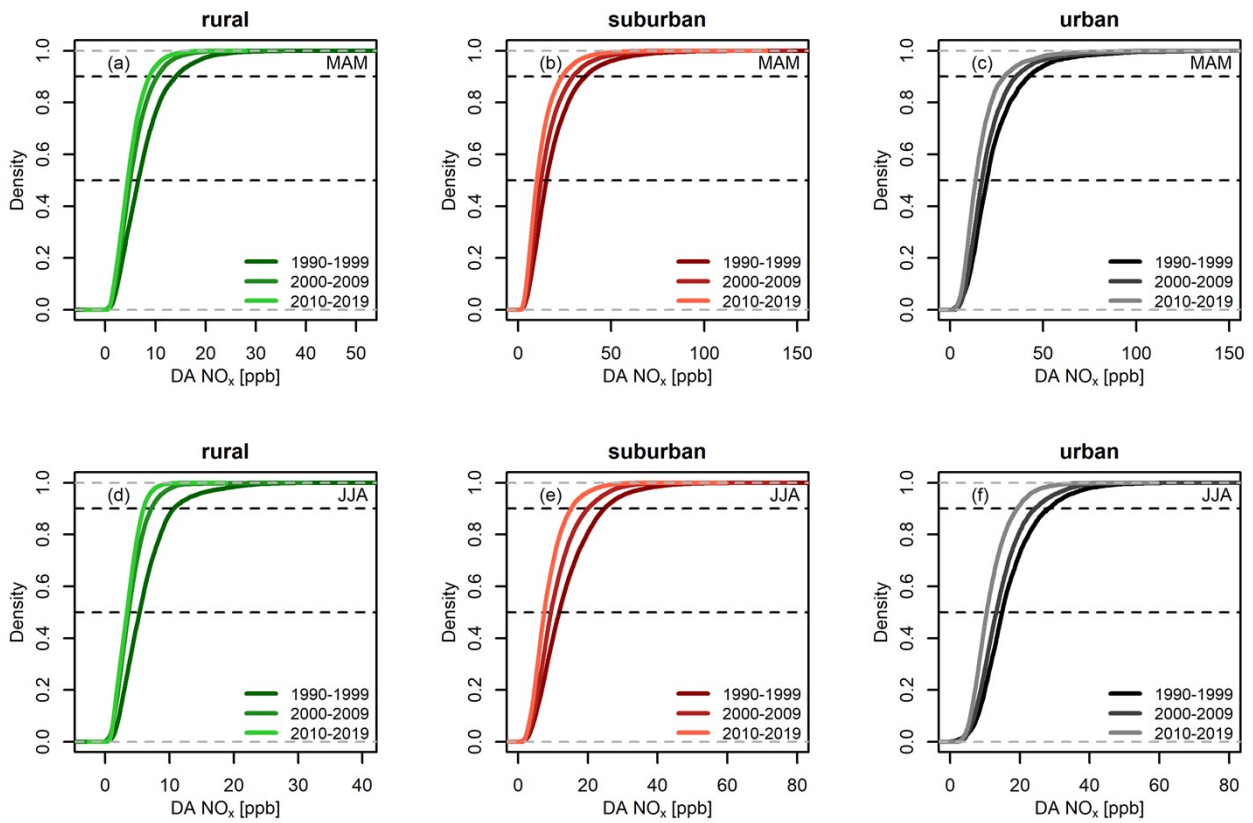

10

**Figure S1:** Empirical cumulative probability distribution functions (ECDFs) of daily average (DA)  $\text{NO}_x$  concentrations for (a) rural, (b) suburban, and (c) urban sites during spring (MAM). (d)-(f) as (a) – (c) but for summer (JJA). Dashed lines in all panels indicate the 50th and 90th percentiles.

15 **Table S2:** Ratios of selected  $\text{NO}_x$  percentiles (50% (q50) and 90%(q90)) for spring and summer seasons for different site types for 10 year study periods relative to 1990-1999.

| Site category / quantile | MAM 2000-2009 | MAM 2010-2019 | JJA 2000-2009 | JJA 2010-2019 |
|--------------------------|---------------|---------------|---------------|---------------|
| Rural q50                | 0.76          | 0.68          | 0.68          | 0.63          |
| Suburban q50             | 0.82          | 0.66          | 0.80          | 0.64          |
| Urban q50                | 0.87          | 0.70          | 0.89          | 0.70          |
| Rural q90                | 0.74          | 0.63          | 0.67          | 0.56          |
| Suburban q90             | 0.82          | 0.65          | 0.81          | 0.62          |
| Urban q90                | 0.84          | 0.69          | 0.86          | 0.68          |

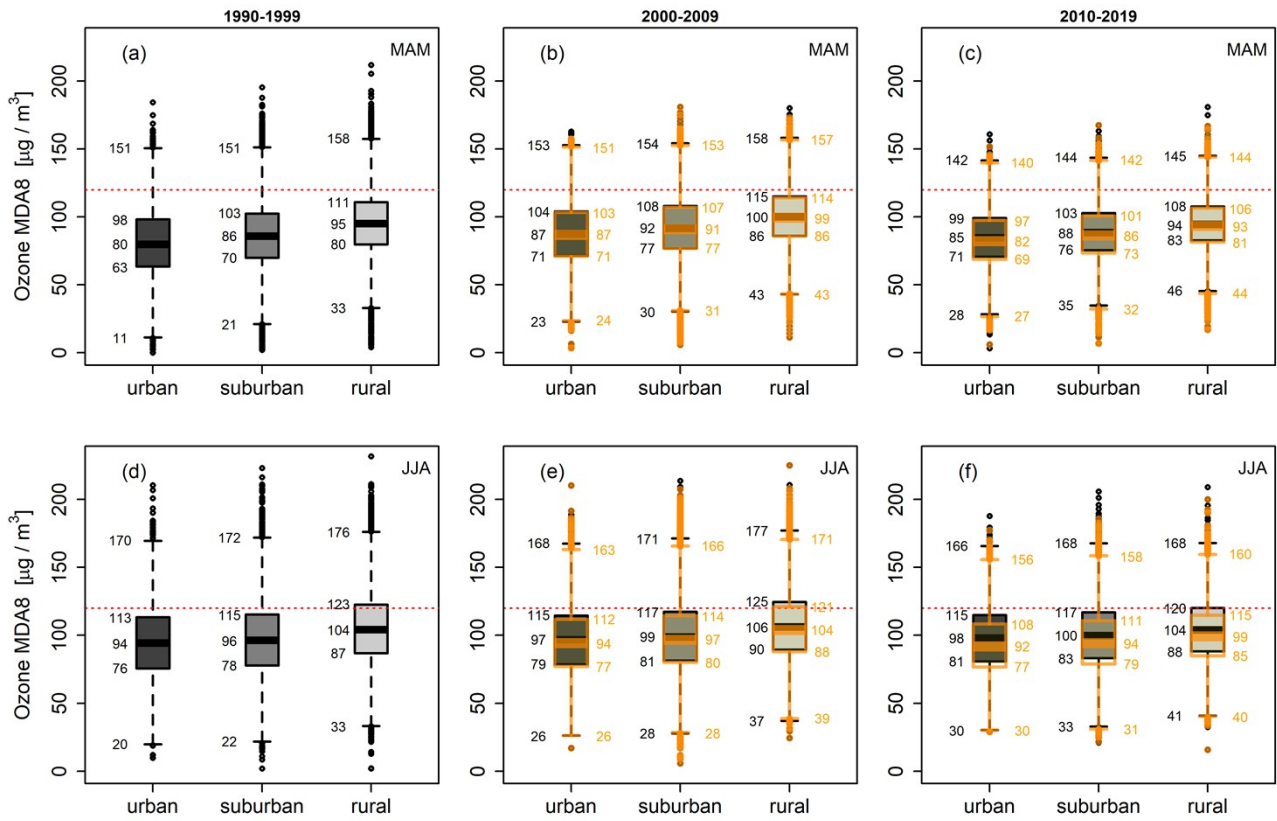

**Figure S2:** As figure 3 but for MDA8 O<sub>3</sub> concentrations.

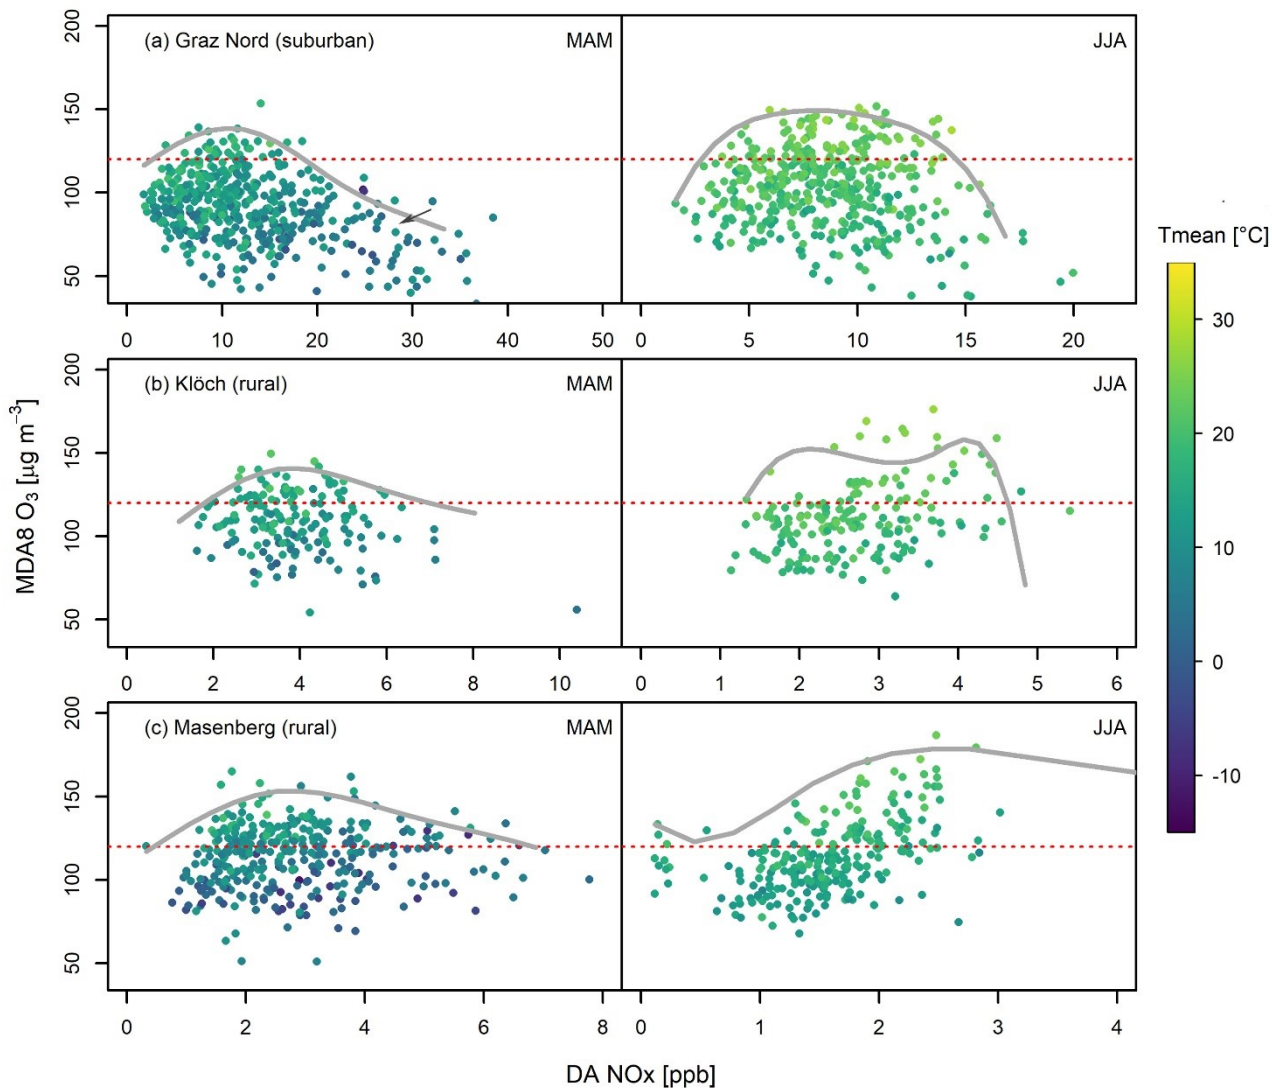

**Figure S3:** As figure 5 but for sites Graz (12% of observations NO<sub>x</sub> limited in JJA), Klösch and Masenberg.

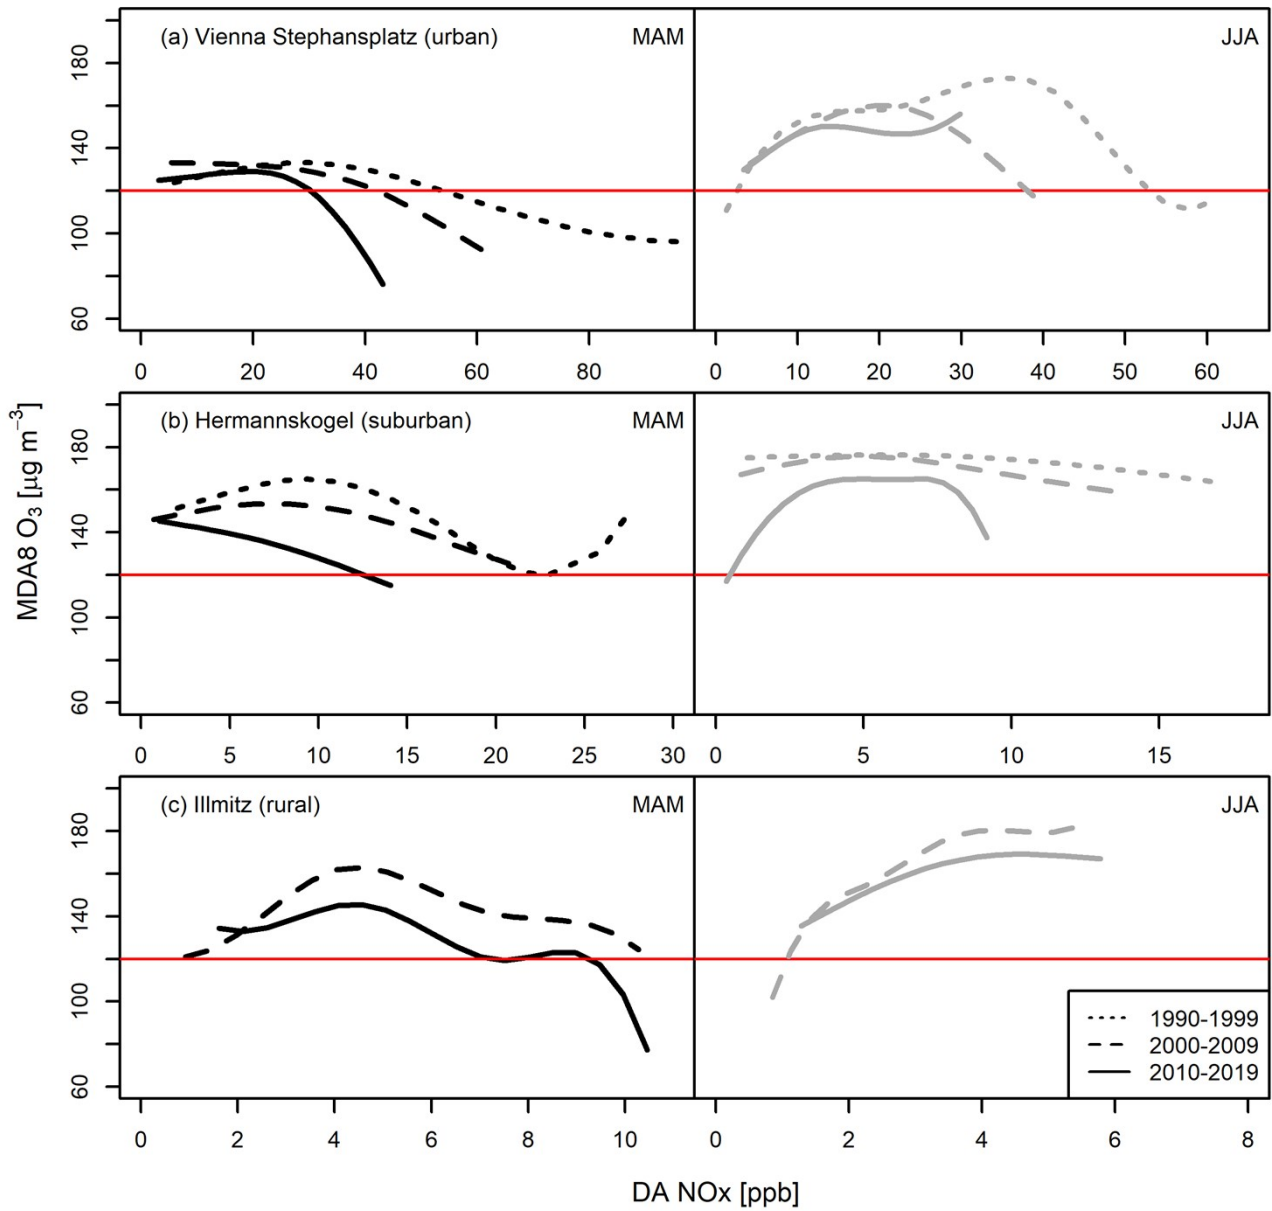

25 **Figure S4:** Evolution of ambient chemical regimes over time for (a) the urban station Vienna Stephansplatz, (b) the suburban site Hermannskogel, and (c) the rural site Illmitz; in analogy to Figure 5. The splines are calculated as polynomial fits of 4<sup>th</sup> order to the envelopes of the scatterplots of MDA8 O<sub>3</sub> and DA NO<sub>x</sub> for the respective decadal time slices. Note, for the rural site Illmitz the period 1990-1999 is not evaluated as NO<sub>x</sub> measurements started only in 1995.

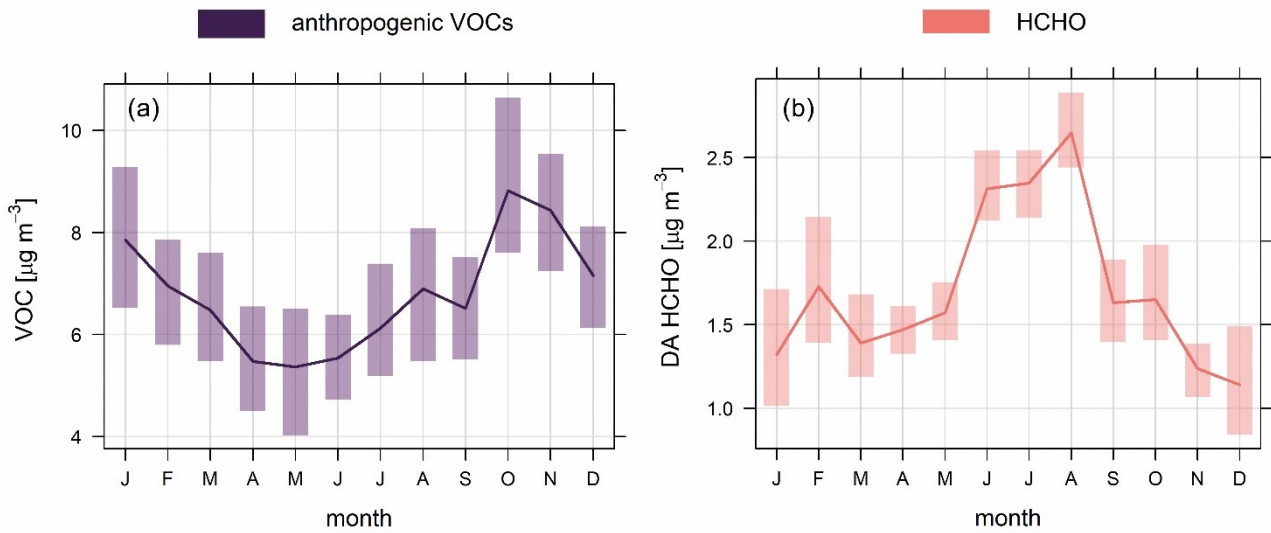

30 **Figure S5:** Annual cycle of (a) the sum of selected anthropogenic VOCs (iso-pentane, 1-pentene, n-pentane, 2-pentene, iso-hexane, n-  
 35 hexane, benzene, iso-octane, n-heptane, toluene, n-octane, ethylbenzene, m-xylene, p-xylene, o-xylene, 1,3,5-Trimethylbenzol, 1,2,4-  
 trimethylbenzene and 1,2,3- trimethylbenzene) and (b) HCHO in Vienna. Data from (a) are collected during 2017-2019 close to the centre  
 of Vienna at the monitoring site AKH. The collection cycle is every 6th day, and samples are analysed by gas chromatography. Data in (b)  
 are HCHO data obtained during 2017-2019 by the MAX-DOAS instrument at BOKU Vienna.

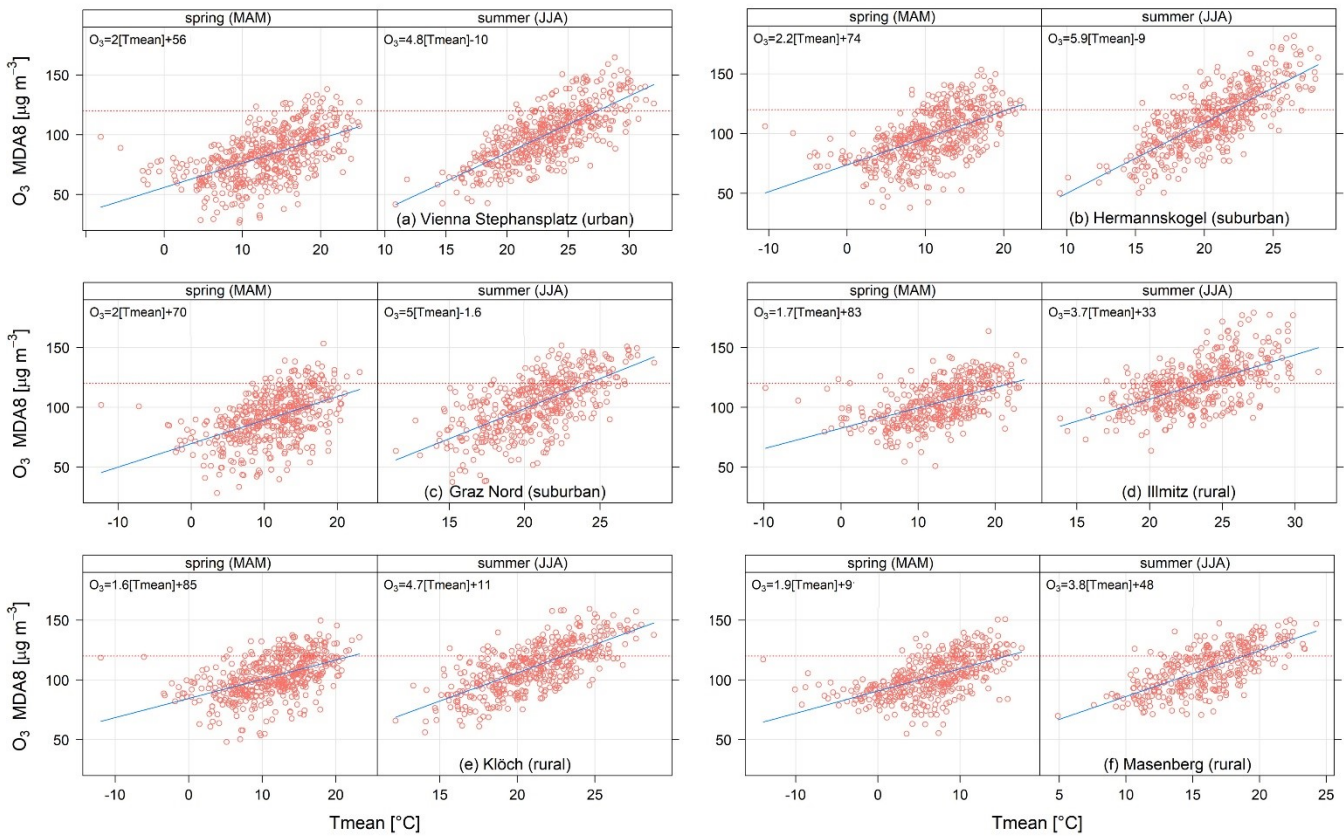

**Figure S6:** Scatterplots of MDA8  $O_3$  versus Tmean for (a) the urban station Vienna Center, (b)-(c) suburban sites Hermannskogel, and Graz,  
 and (d)-(f) rural sites Illmitz, Klösch, und Masenberg for 20010 – 2019. The red dotted line in all panels indicates the MDA8 target value for  
 the protection of human health of  $120 \mu\text{g}/\text{m}^3$ , blue lines provide linear regression fits.

45

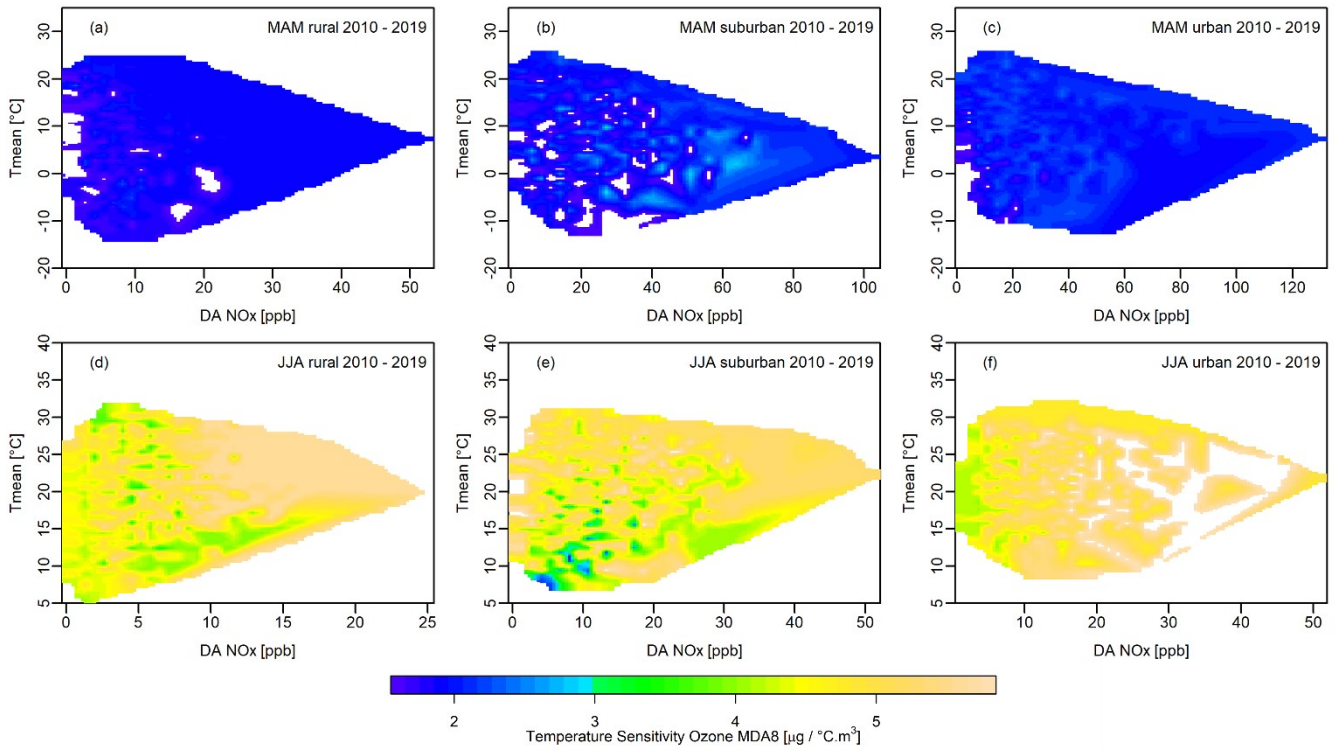

**Figure S7:** MDA8 ozone temperature sensitivities with respect to Tmean for rural, suburban, and urban monitors for various DA NO<sub>x</sub> concentrations and mean temperatures. The ozone temperature sensitivities under clear sky conditions are shown for spring (MAM) in the top panel (a)-(c) and for summer (JJA) in the bottom panel (d)-(f). These data are used to compile the contour plots given in figure 7.

50

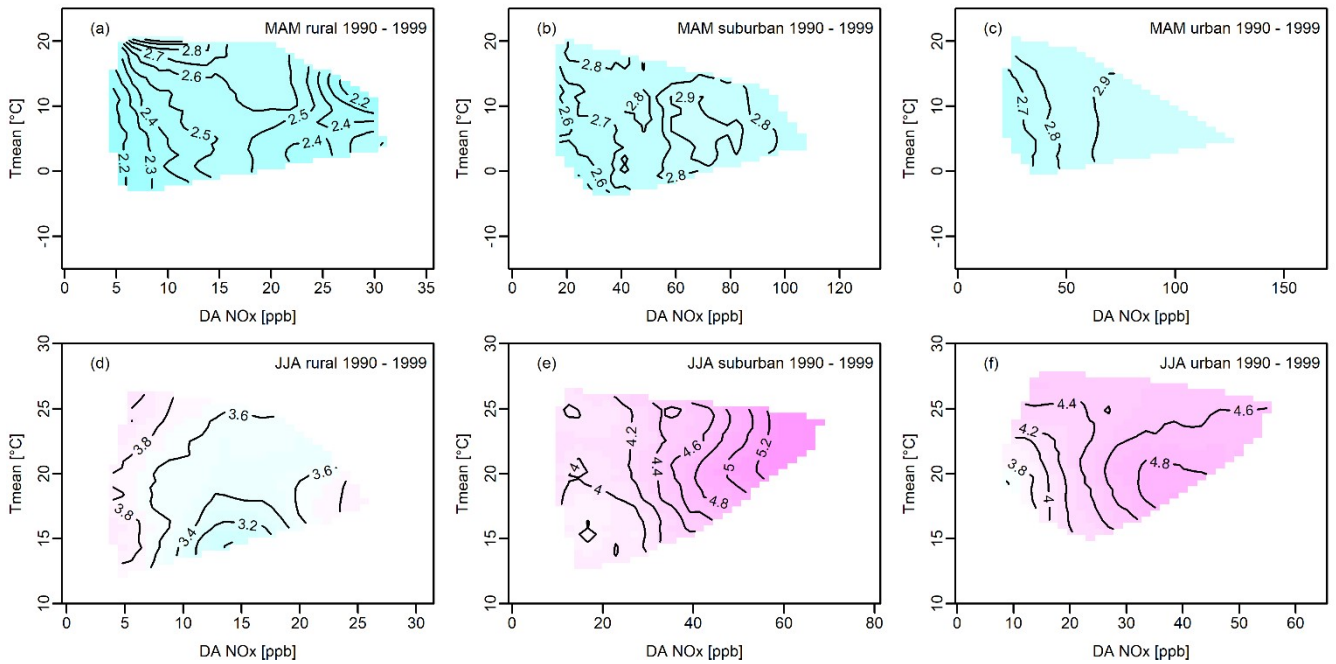

**Figure S8:** MDA8 O<sub>3</sub> temperature sensitivities with respect to Tmean for rural, suburban, and urban monitors for various DA NO<sub>x</sub> concentrations and mean temperatures. The ozone temperature sensitivities for 1990-1999 under clear sky conditions are shown for spring (MAM) in the top panel (a)-(c) and for summer (JJA) in the bottom panel (d)-(f). The contours of the temperature sensitivity of ozone are given in  $\mu\text{g}/^\circ\text{C}\cdot\text{m}^3$  with respect to changes of Tmean.

55

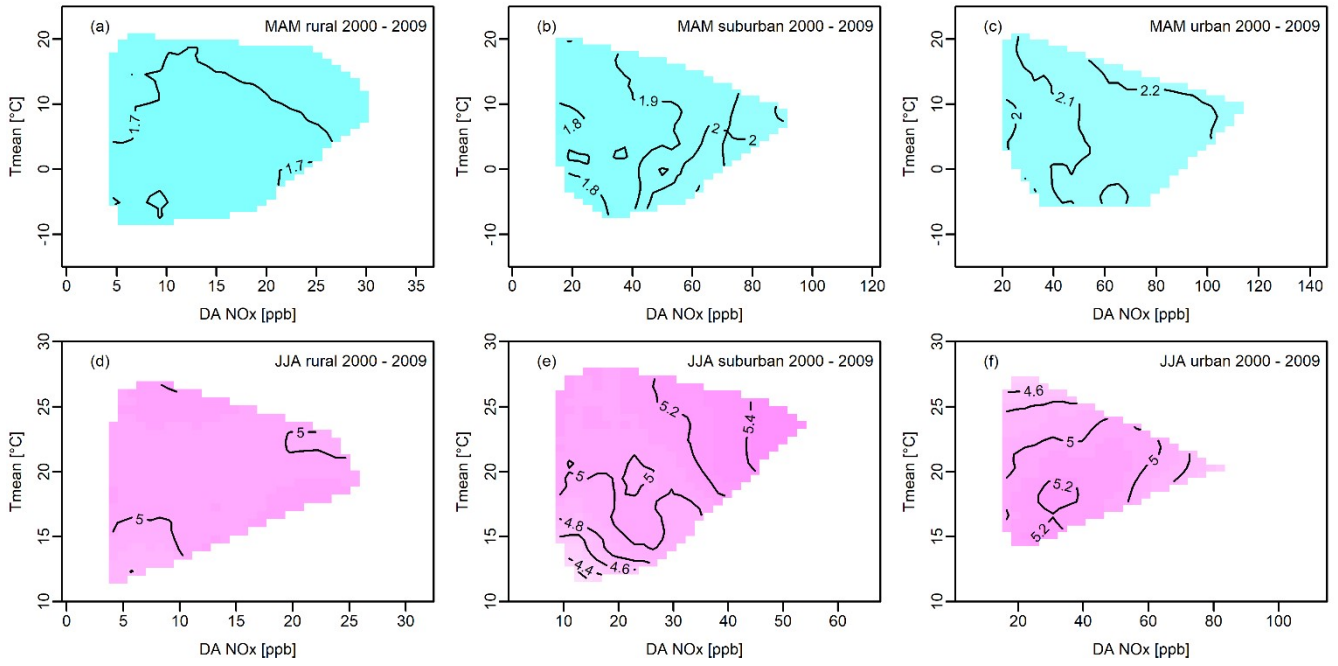

**Figure S9:** MDA8 O<sub>3</sub> temperature sensitivities with respect to Tmean for rural, suburban, and urban monitors for various DA NO<sub>x</sub> concentrations and mean temperatures. The ozone temperature sensitivities for 1990-1999 under clear sky conditions are shown for spring (MAM) in the top panel (a)-(c) and for summer (JJA) in the bottom panel (d)-(f). The contours of the temperature sensitivity of ozone are given in µg/°C.m<sup>3</sup> with respect to changes of Tmean.
